# Supplementary material
Source: PubMed Central journal article supplement (PMC4234590)
Supplement: pnas.201417334SI.pdf [file pnas.201417334SI.pdf]

# Supporting Information

Kannan et al. 10.1073/pnas.1417334111

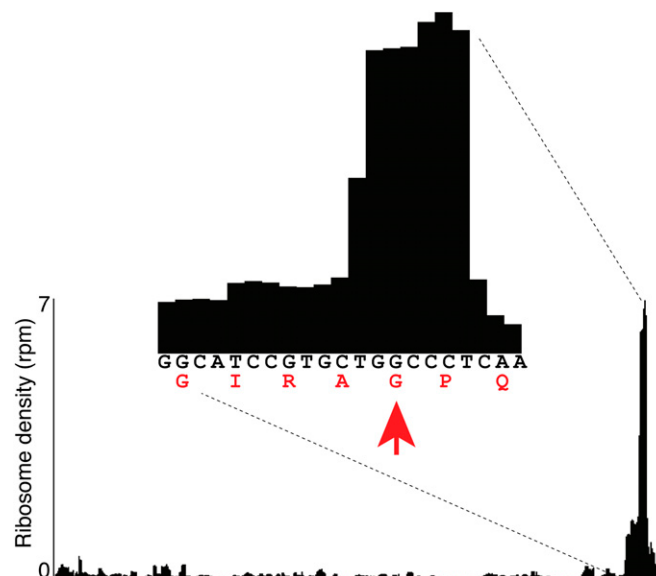

**Fig. S1.** Translation of *secM* in the absence of antibiotics is arrested when the Gly<sub>165</sub> codon enters the ribosomal P site (1). Because of the ambiguity of assigning the ribosome placement from the analysis of sequenced protected mRNA fragments, the peak of the computed ribosome density spans the P- and A-site codons of mRNA in the stalled ribosome.

1. Muto H, Nakatogawa H, Ito K (2006) Genetically encoded but nonpolypeptide prolyl-tRNA functions in the A site for SecM-mediated ribosomal stall. *Molec Cell* 22(4):545–552.

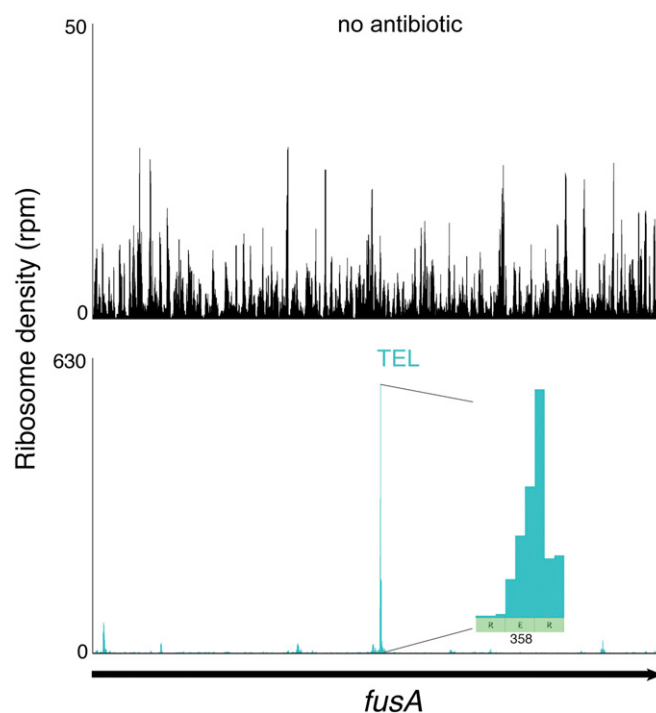

**Fig. S2.** Ribosome profiling shows TEL-induced ribosome stalling during translation of the *fusA* gene in vivo at the site that agrees with the previous observation of TEL-dependent arrest at the middle codon of the RE<sub>358</sub>R sequence in vitro (1).

1. Kannan K, Vazquez-Laslop N, Mankin AS (2012) Selective protein synthesis by ribosomes with a drug-obstructed exit tunnel. *Cell* 151(3):508–520.

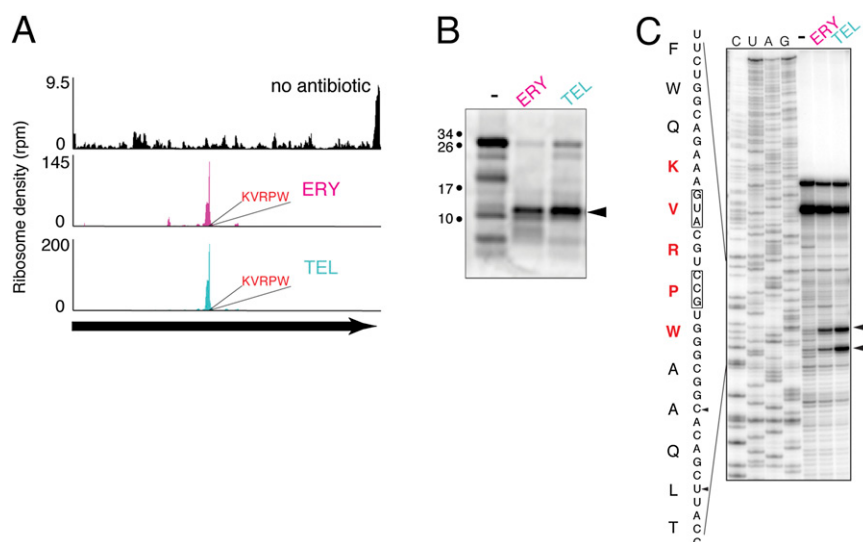

**Fig. S3.** Defining the exact sites of macrolide-induced ribosome stalling in the *rseA* (ORF) containing the XP (RPW) motif. *A* represents the ribosome density within the *rseA* ORF in the ribosome profiling experiments, the gel in *B* shows fractionation of the [<sup>35</sup>S]-labeled protein products of translation of the ORF in the S30 cell-free system, and the sequencing gel in *C* shows the results of toe-printing analysis of ribosome stalling during translation of the 5'-terminally truncated ORF in the in vitro system composed of purified components. Arrowheads show the main translation products and the main toe-printing bands corresponding to the peaks of the ribosome density in the profiling experiments. Note that in the *rseA* ORF macrolides induce ribosome stalling at two sites: Val codon within the KVR sequence representing the [+]*X*[+] motif and Pro codon of the XP motif.

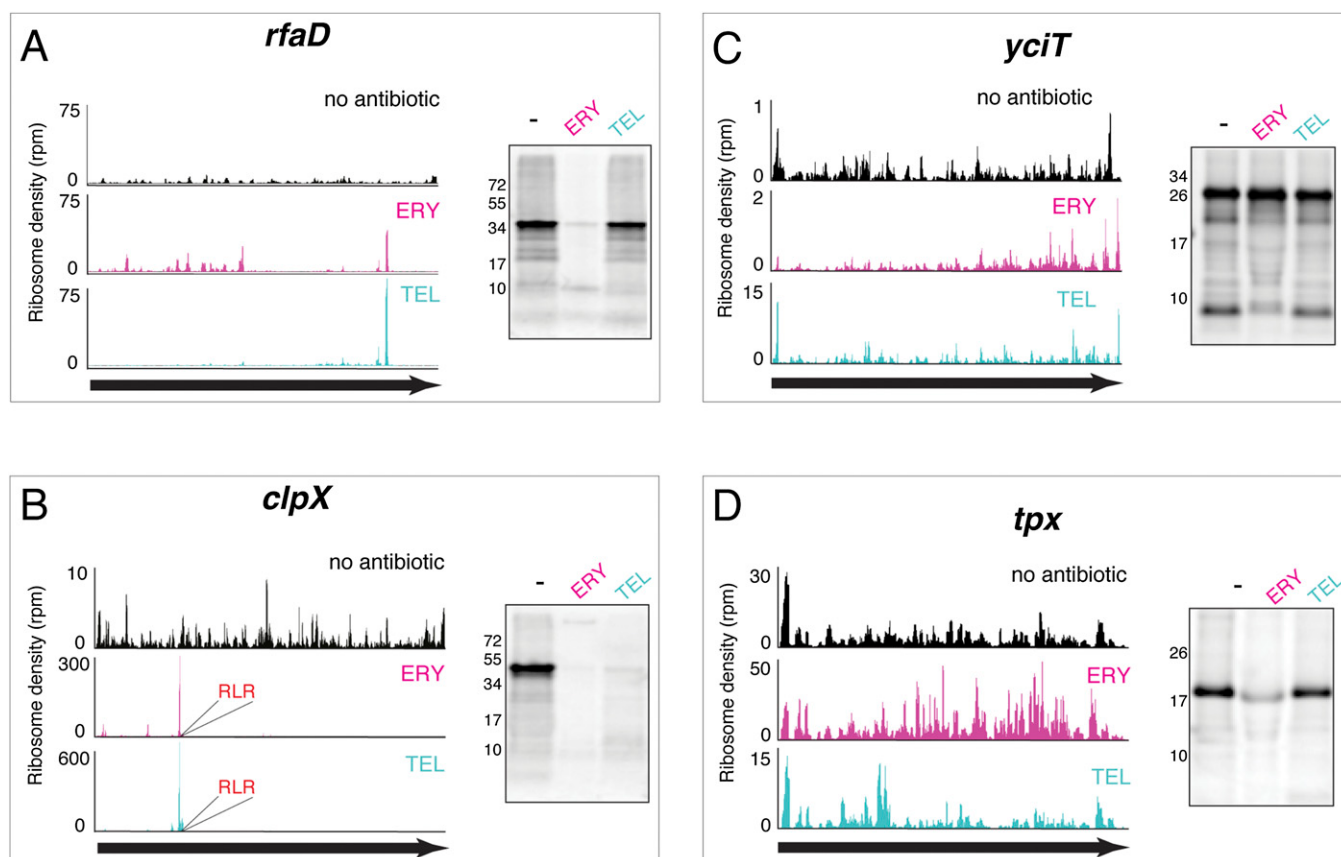

**Fig. S4.** Some of the in vivo effects of macrolide antibiotics are not readily reproduced in vitro. (A) Late arrest induced by TEL during translation of the *rfaD* ORF in the bacterial cell (Left) is not observed during in vitro translation (Right, SDS gel). (B) ERY and TEL cause strong ribosome stalling at the RL<sub>99</sub>R motif of *clpX* in vivo (Fig. S4), but the corresponding ~10-kDa truncated polypeptide was not observed during cell-free translation, possibly due to inhibition of the *clpX* in vitro synthesis at the earlier codons. Although translation of the *yciT* (C) and *tpx* (D) ORFs is resistant to macrolides in vivo, only *yciT* maintains resistance to both macrolides in a cell-free system, whereas *tpx* is susceptible to ERY inhibition in vitro.

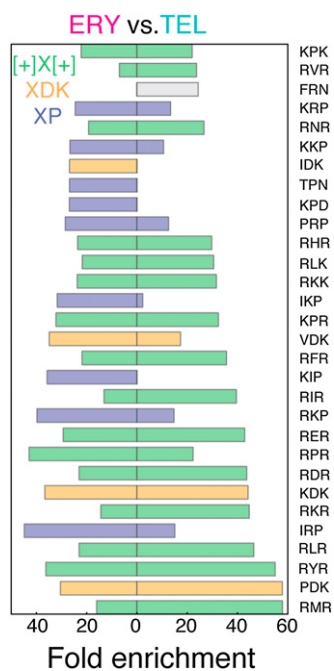

**Fig. S5.** Comparison of the top TEL and ERY arrest motifs shows that the chemical structure of the antibiotic significantly affects sequence specificity of the drug action.

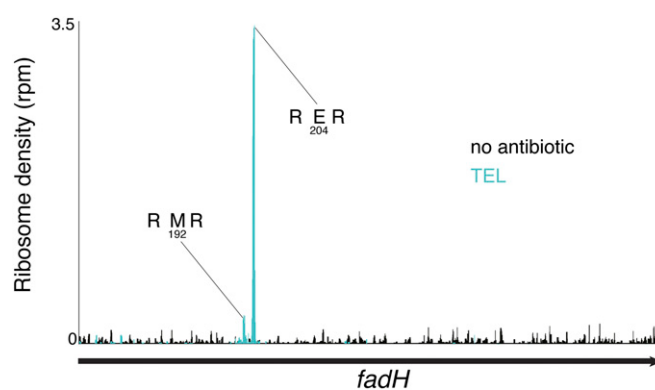

**Fig. S6.** Translation of *fadH* in the presence of TEL is poorly arrested at the RM<sub>192</sub>R site, which carries the triamino acid sequence with the highest enrichment in the sites of TEL-induced arrest (Fig. 3B), but is stalled at the downstream RE<sub>204</sub>R site.
